1 **Estimating parasite load dynamics to reveal novel resistance mechanisms to**  
2 **human malaria**

3 **Short Title: Resistance mechanisms against Falciparum Malaria**

4 Michael T. Bretscher<sup>#1,a</sup>, Athina Georgiadou<sup>#2</sup>, Hyun Jae Lee<sup>#3</sup>, Michael Walther<sup>4b</sup>, Anna E.  
5 van Beek<sup>5,6</sup>, Fadlila Fitriani<sup>2</sup>, Diana Wouters<sup>5</sup>, Taco W. Kuijpers<sup>6,7</sup>, Davis Nwakanma<sup>4</sup>,  
6 Umberto D'Alessandro<sup>4</sup>, Eleanor M. Riley<sup>8,9</sup>, Michael Levin<sup>2</sup>, Lachlan J. Coin<sup>3</sup>, Azra Ghani<sup>1</sup>,  
7 David J. Conway<sup>10</sup>, Aubrey J. Cunnington<sup>2\*</sup>

8 <sup>1</sup>Medical Research Council Centre for Outbreak Analysis and Modelling, Imperial College,  
9 London, United Kingdom

10 <sup>2</sup>Section of Paediatrics, Imperial College, London, United Kingdom

11 <sup>3</sup>Institute for Molecular Bioscience, University of Queensland, Brisbane, Australia

12 <sup>4</sup>MRC Unit The Gambia at the London School of Hygiene and Tropical Medicine, Fajara,  
13 The Gambia

14 <sup>5</sup>Department of Immunopathology, Sanquin Research and Landsteiner Laboratory of the  
15 Academic Medical Centre, University of Amsterdam, Amsterdam, the Netherlands

16 <sup>6</sup>Department of Pediatric Hematology, Immunology and Infectious Diseases, Emma  
17 Children's Hospital, Academic Medical Centre, Amsterdam, the Netherlands

18 <sup>7</sup>Department of Blood Cell Research, Sanquin Research and Landsteiner Laboratory of the  
19 Academic Medical Centre, University of Amsterdam, Amsterdam, the Netherlands

20 <sup>8</sup> The Roslin Institute and the Royal (Dick) School of Veterinary Studies, University of  
21 Edinburgh, Edinburgh, United Kingdom

22 <sup>9</sup>Department of Immunology and Infection, London School of Hygiene and Tropical  
23 Medicine, London, United Kingdom

24 <sup>10</sup>Department of Pathogen Molecular Biology, London School of Hygiene and Tropical  
25 Medicine, United Kingdom

26 \*Corresponding author: [a.cunnington@imperial.ac.uk](mailto:a.cunnington@imperial.ac.uk) (AJC)

27 <sup>#</sup>Denotes equal contribution

28 <sup>b</sup>Current address: Untere Grabenstraße 10, 88299 Leutkirch, Germany

29 <sup>a</sup>MTB performed the work related to this publication at Imperial College and is now an  
30 employee of F. Hoffmann-La Roche Ltd.

31

32 **Abstract:**

33 Improved methods are needed to identify host mechanisms which directly protect against  
34 human infectious diseases in order to develop better vaccines and therapeutics<sup>1,2</sup>. Pathogen  
35 load determines the outcome of many infections<sup>3</sup>, and is a consequence of pathogen  
36 multiplication rate, duration of the infection, and inhibition or killing of pathogen by the host  
37 (resistance). If these determinants of pathogen load could be quantified then their mechanistic  
38 correlates might be determined. In humans the timing of infection is rarely known and  
39 treatment cannot usually be withheld to monitor serial changes in pathogen load and host  
40 response. Here we present an approach to overcome this and identify potential mechanisms of  
41 resistance which control parasite load in *Plasmodium falciparum* malaria. Using a  
42 mathematical model of longitudinal infection dynamics for orientation, we made  
43 individualized estimates of parasite multiplication and growth inhibition in Gambian children  
44 at presentation with acute malaria and used whole blood RNA-sequencing to identify their  
45 correlates. We identified novel roles for secreted proteases cathepsin G and matrix  
46 metalloproteinase 9 (MMP9) as direct effector molecules which inhibit *P. falciparum* growth.  
47 Cathepsin G acts on the erythrocyte membrane, cleaving surface receptors required for  
48 parasite invasion, whilst MMP9 acts on the parasite. In contrast, the type 1 interferon  
49 response and expression of *CXCL10* (IFN- $\gamma$ -inducible protein of 10 kDa, IP-10) were  
50 detrimental to control of parasite growth. Natural variation in iron status and plasma levels of  
51 complement factor H were determinants of parasite multiplication rate. Our findings  
52 demonstrate the importance of accounting for the dynamic interaction between host and  
53 pathogen when seeking to identify correlates of protection, and reveal novel mechanisms  
54 controlling parasite growth in humans. This approach could be extended to identify additional  
55 mechanistic correlates of natural- and vaccine-induced immunity to malaria and other  
56 infections.

57 **Main Text**

58 To heuristically estimate the hidden dynamics of parasite load (Fig 1a) in naturally-infected  
59 malaria patients we calibrated a statistical prediction model using outputs from a mechanistic  
60 simulation which combined information from two datasets (Fig 1b). A historical dataset of  
61 the longitudinal course of infection in patients who were deliberately inoculated with *P.*  
62 *falciparum* as a treatment for neurosyphilis (malariatherapy) (Extended Data Figure 1) was  
63 used as a reference for changes in parasite load over time<sup>4</sup>. In this dataset, relationships were  
64 defined between measured and latent variables (which we assume to determine changes in  
65 parasite load over time), broadly based on a mathematical model proposed by Dietz et al.<sup>4</sup>.  
66 Measurements from Gambian children with malaria at the time of clinical presentation  
67 (Extended Data Table 1) were then used to estimate the values of the latent variables and  
68 dynamics of parasite load in individual children.

69 In our model, ascending parasite load dynamics (up to the first peak) in the malariatherapy  
70 reference data can be largely described with two individual-specific latent variables (Fig 1a,  
71 see Methods): the within-host multiplication rate,  $m$ , which is the initial rate of increase in  
72 parasite load before any constraint by the host response; and  $P_c$ , which is defined by the  
73 parasite load required to stimulate a host response that reduces parasite growth by 50%<sup>4</sup>.  
74 When  $m$ ,  $P_c$ , and parasite load are known, the parasite growth inhibition (PGI) by the host  
75 response at that point in time can be calculated. We determined the relationships between  
76 ascending parasite load, onset of fever,  $m$ , and  $P_c$  and their inter-individual variation in 97  
77 malariatherapy subjects in the reference dataset. We then sought the best fit for the  
78 distribution of these parameters and their inter-relationships to explain parasite load and  
79 duration of illness at the time of presentation using data from 139 Gambian children with  
80 malaria (Extended Data Table 1). To provide an additional point of reference we assumed

81 that plasma TNF concentration in the Gambian children should be related to the intensity of  
82 the protective host response because this cytokine has been shown to augment parasite  
83 growth inhibition by human cells<sup>5,6</sup>. The optimal relationship between TNF and growth  
84 inhibition was determined using a maximum-likelihood approach (see Methods and  
85 Supplementary Figure 1). Other model assumptions and definitions are shown in Extended  
86 Data Table 2. To accommodate biological variation between Gambian children and adult  
87 malariatherapy subjects we allowed parameters to be rescaled to improve the fit between the  
88 two datasets, resulting in  $P_c$  values in the Gambian children being higher than those in the  
89 malariatherapy subjects (see Methods). This implies that Gambian children required a higher  
90 parasite load than the adult malariatherapy subjects to stimulate a similar host response and is  
91 consistent with epidemiological data showing higher fever thresholds in *P. falciparum*  
92 infected children than in adults<sup>7</sup>.

93 After defining the relationships between parasite load, duration of fever, TNF concentration,  
94  $m$ , and  $P_c$  for the Gambian dataset as a whole (Figure 1c), we predicted values of  $m$  and  $P_c$  for  
95 individual Gambian children based on their measured parasite load and plasma TNF  
96 concentration and their reported duration of fever (Extended Data Table 3). Parasite load,  
97 TNF, predicted  $m$ , and predicted  $P_c$  values were highest in those with the most severe  
98 manifestations of malaria (SM2), intermediate in those with prostration as the only  
99 manifestation of severe disease (SM1), and lowest in uncomplicated malaria (UM) (Fig 1d-  
100 g). Duration of illness and estimated PGI at the time of presentation did not differ  
101 significantly by clinical phenotype (Fig 1h-i).

102 Since age can be a major determinant of malaria severity and naturally acquired immunity<sup>8,9</sup>,  
103 we examined whether age was associated with  $m$  or  $P_c$ . In this population age was not  
104 significantly correlated with  $m$  but was significantly negatively correlated with  $P_c$  (Fig 1j-k).

105 This implies little age-related acquisition of constitutive resistance (for example, naturally-  
 106 acquired antibody-mediated immunity) in children in this region of The Gambia, which might  
 107 be expected from the relatively low malaria transmission<sup>10,11</sup>. However, these data also  
 108 indicate that a lower parasite load should be needed to generate an equivalent protective host  
 109 response to parasites in older individuals.

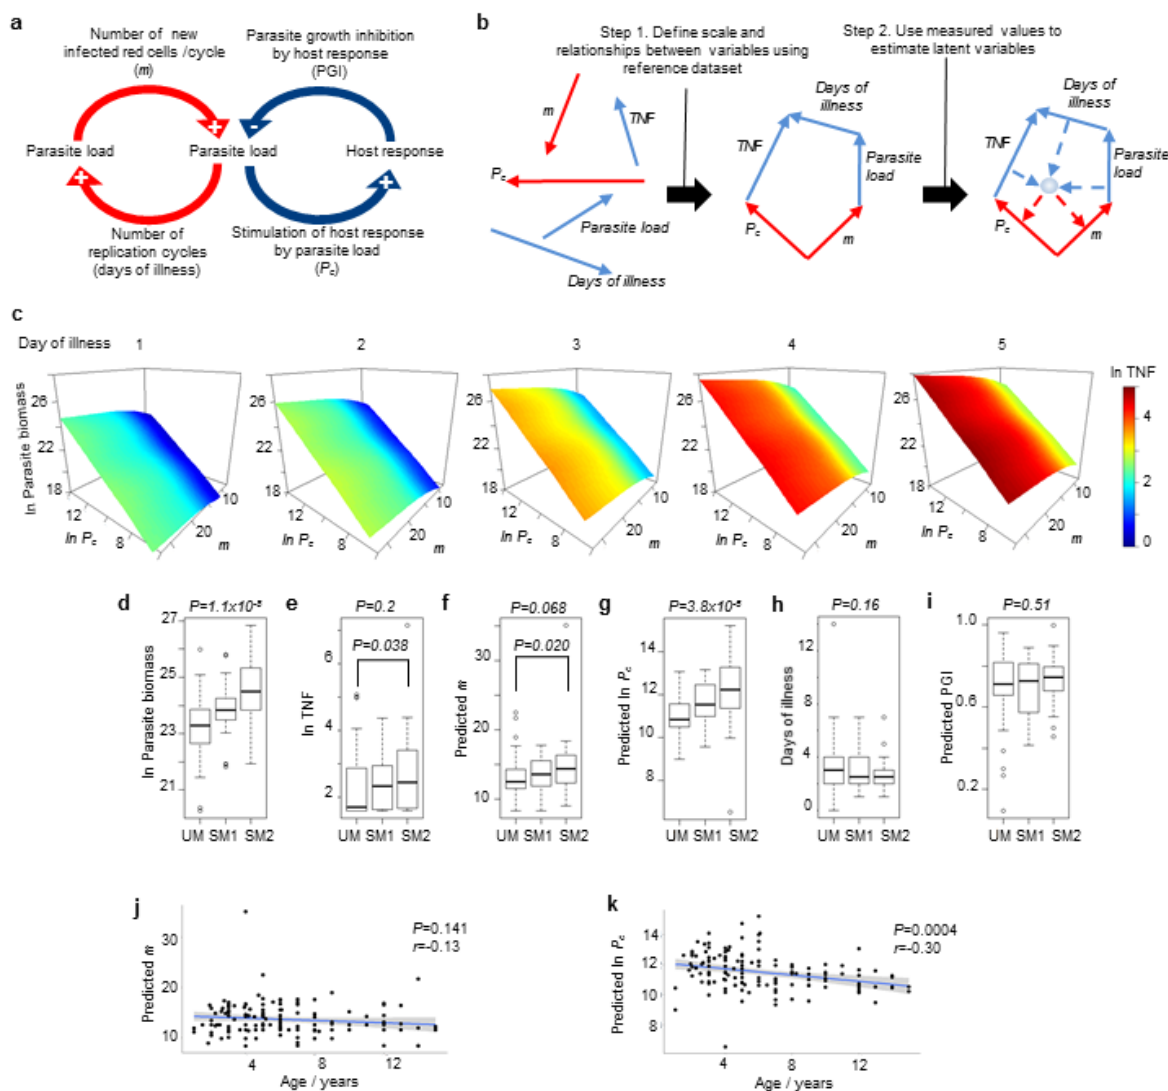

110

111 **Fig 1. Estimating the dynamics of parasite load and host response in malaria.**

112 (a, b) Conceptual models of the major determinants of parasite load (a) and a framework for  
 113 use of measurable variables at a single point in time (parasite load, duration of illness, plasma

114 TNF, blue lines) to estimate latent variables ( $m$  and  $P_c$ , red lines) **(b)**. **(c)** Simulated  
115 relationships between  $P_c$ ,  $m$ , parasite biomass, duration of illness and TNF concentrations in  
116 Gambian children. **(d-i)** Comparisons of parasite biomass **(d)**, TNF **(e)**, predicted  $m$  **(f)**,  
117 predicted  $P_c$  **(g)**, duration of illness **(h)**, and predicted parasite growth inhibition (PGI, **i**), in  
118 139 Gambian children with uncomplicated (UM,  $n=64$ ) or severe malaria (SM1, prostration,  
119  $n=36$ ; SM2, any combination of cerebral malaria, hyperlactatemia or severe anemia,  $n=39$ ).  
120 Boxes show median and interquartile range, whiskers extend 1.5-times the interquartile range  
121 or to limit of range;  $P$  for ANOVA (above plots), and for Mann-Witney test (UM vs SM2,  
122 within plots). **(j, k)** Correlation of predicted  $m$  **(j)** or  $P_c$  **(k)** with age (blue line, linear  
123 regression; shaded area 95% confidence interval),  $P$  for Pearson correlation.  
124

125 To determine whether our model-derived estimates could be used to aid discovery of  
126 mechanistic correlates of resistance to *P. falciparum* we performed RNA sequencing on  
127 whole blood collected from 23 of the subjects (13 with UM, 10 with SM, Extended Data  
128 Table 4) at time of presentation. To avoid confounding by differences in the proportions of  
129 major leukocyte subpopulations we performed gene signature-based deconvolution and  
130 adjusted total gene expression for cell-mixture. 51 human genes were significantly correlated  
131 (26 positively, 25 negatively) with the estimated PGI after adjustment for false discovery  
132 rate. We reasoned that these genes should be enriched for effector mechanisms which control  
133 parasite load *in vivo*. The positively correlated genes (Fig 2a), associated with enhanced  
134 control of parasite growth, showed limited canonical pathway enrichments (Extended Data  
135 Table 5) but 16 (62%) were linked together in a network around extracellular signal-regulated  
136 kinases ERK1/2 and AKT serine/threonine kinase (Fig 2b). These kinases integrate cellular  
137 inflammatory and metabolic responses to control innate defence mechanisms such as  
138 cytokine secretion, phagocytosis and degranulation<sup>12,13</sup>. The 25 genes negatively correlated  
139 with PGI (Fig 2c), associated with poorer control of parasite growth, were strongly enriched  
140 in immune response pathways (Extended Data Table 5). Network analysis showed 15 (60%)  
141 of the negatively correlated genes were linked through a network focussed around type 1  
142 interferon (Fig 2d). These findings are consistent with observations that sustained type 1  
143 interferon signalling can impair control of parasite load in mice<sup>14-18</sup> and potentially in  
144 humans<sup>14,19</sup>. C-X-C motif chemokine ligand 10 (CXCL10, also known as IFN- $\gamma$ -inducible  
145 protein of 10 kDa, IP-10) expression had the greatest log-fold change of the genes negatively  
146 correlated with PGI (Fig 2c), consistent with findings that CXCL10 expression impairs  
147 control of parasite load in mice<sup>20</sup>.

148



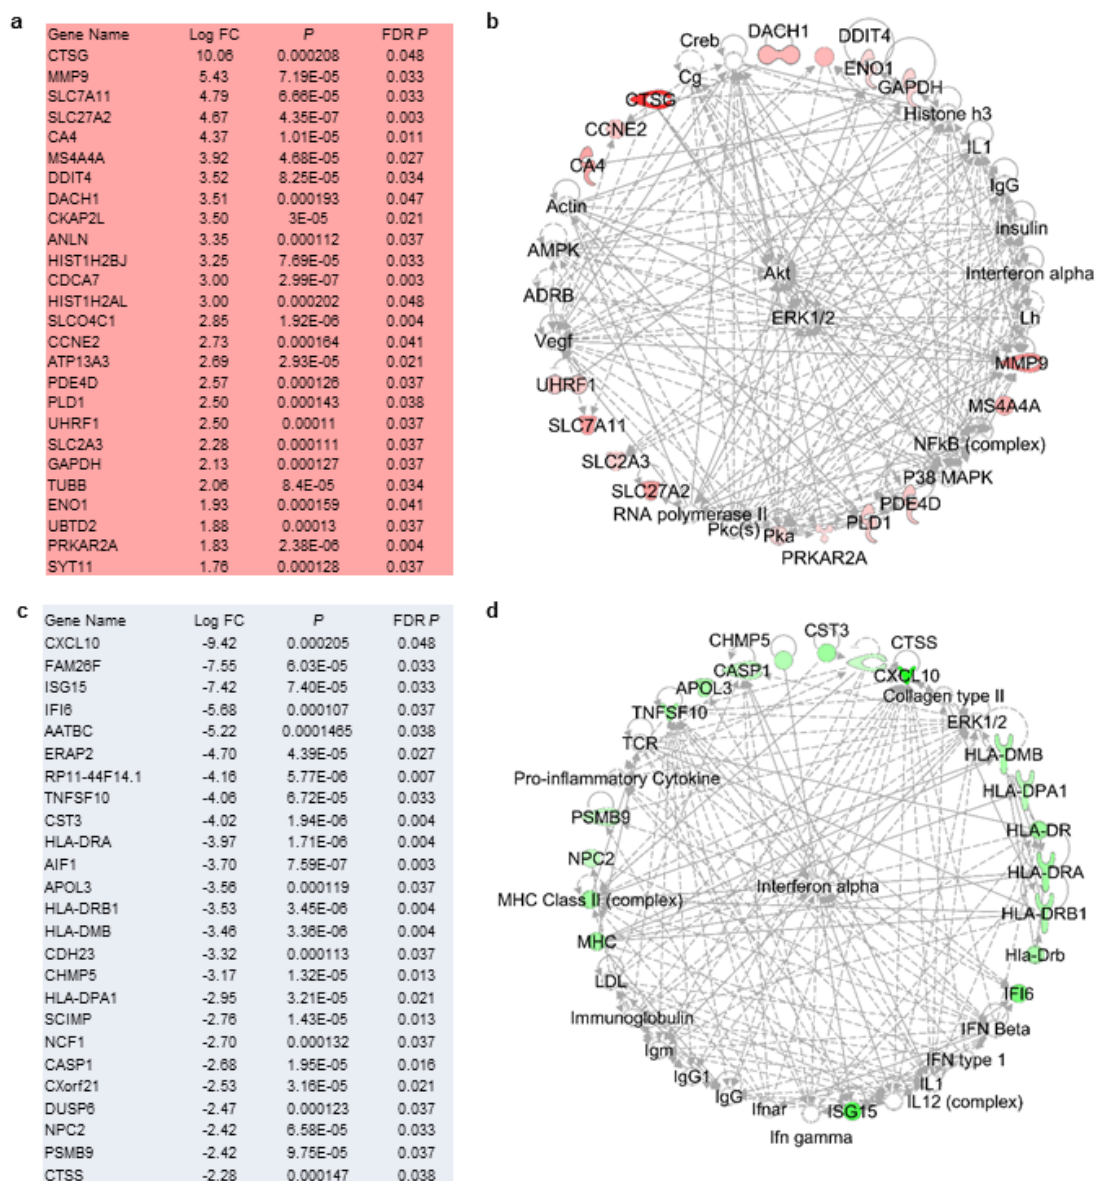

149

150 **Fig. 2 Transcriptional correlates of parasite growth inhibition**

151 **(a, b)** Genes significantly positively correlated with parasite growth inhibition (ie. predicted  
 152 to reduce parasite growth) after adjustment for false discovery **(a)** and primary network  
 153 derived from these genes **(b)**. **(c, d)** Genes significantly negatively correlated with parasite  
 154 growth inhibition (predicted to increase parasite growth) after adjustment for false discovery  
 155 **(c)**, and primary network derived from these genes **(d)**.

156

157 None of the genes positively correlated with PGI have previously been described as  
158 mediators of resistance to malaria so we sought direct biological evidence, focussing on  
159 genes encoding secreted proteins as the best candidates. Of the 26 genes, two encode  
160 predominantly secreted proteins: *CTSG* (cathepsin G) and *MMP9* (matrix metalloproteinase 9,  
161 also known as gelatinase B). Cathepsin G localizes in neutrophil azurophil granules whilst  
162 *MMP9* localises in neutrophil gelatinase and specific granules<sup>21</sup>. Treatment with recombinant  
163 cathepsin G and *MMP9* inhibited growth of *P. falciparum* 3D7 strain *in vitro* (Fig 3a). In  
164 order to elucidate mechanisms of action we examined whether these proteases inhibited  
165 parasite growth by preventing invasion of erythrocytes. Addition of cathepsin G to schizont  
166 cultures produced a dramatic reduction in invasion, and pretreatment of erythrocytes with  
167 cathepsin G before adding them to schizont cultures produced a similar reduction in their  
168 invasion (Fig 3b), indicating that cathepsin G acts primarily on the erythrocyte (Fig 3b).  
169 Addition of *MMP9* to schizont cultures produced a more modest reduction, whilst  
170 pretreatment of erythrocytes did not reduce invasion, implying that *MMP9* likely acts against  
171 schizonts or free merozoites rather than preventing invasion at the erythrocyte surface (Fig  
172 3b).

173 In order to identify biologically relevant concentrations of cathepsin G and *MMP9* we  
174 measured their concentrations in whole blood from healthy donors, before and after  
175 degranulation was stimulated with PMA, and in plasma from children with malaria at the  
176 time of clinical presentation (Fig 3c). Local concentrations which might occur *in vivo*,  
177 adjacent to degranulating neutrophils, could be at least an order of magnitude higher<sup>22</sup>.  
178 *MMP9* dose-dependently inhibited parasite growth over a physiological range of  
179 concentrations (Fig 3d). Similarly, parasite invasion was dose-dependently inhibited by

180 cathepsin G pre-treatment of erythrocytes, with similar effects in each of four parasite strains  
181 with different invasion phenotypes<sup>23</sup> (Fig 3e). We therefore asked whether cathepsin G might  
182 cleave a range of RBC surface proteins which are used as invasion receptors by *P.*  
183 *falciparum*<sup>24</sup>. Consistent with its broad inhibition of parasite invasion, cathepsin G dose-  
184 dependently cleaved the majority of *P. falciparum* invasion receptors including glycophorins  
185 A, B, and C, CD147 (basigin), CD108 (semaphorin 7A), and complement receptor 1 (CR1),  
186 but not CD55 (DAF) (Fig 3f). MMP9 did not cleave any of these surface receptors (Extended  
187 Data Figure 2). PMA stimulation of healthy donor whole blood recapitulated the loss of  
188 erythrocyte surface glycoproteins A and B, CD108 and CD147 in all donors, decreased  
189 glycoprotein C expression in 6 of 8 healthy donors, but did not consistently reduce CR1 (Fig  
190 3g) (as might be expected from the dose-response curves, Fig 3f). In samples from Gambian  
191 children on the day of presentation with *P. falciparum* malaria, the proportions of  
192 erythrocytes with detectable expression of glycoproteins A and B and CD147 were  
193 significantly lower than in convalescent samples (28 days after treatment), and there was a  
194 trend to lower expression of CD108 and glycoprotein C (Fig 3h). These results would be  
195 consistent with cleavage of these surface molecules *in vivo* during acute infection. The  
196 variable expression seen at day 28 (Fig 3h) may indicate the persistence of modified  
197 erythrocytes in the circulation. The importance of glycoproteins and basigin in RBC invasion  
198 and genetic susceptibility to severe malaria is well established<sup>25-28</sup>, and so it is highly likely  
199 that the cleavage of these erythrocyte receptors by cathepsin G would have a protective effect  
200 *in vivo*.

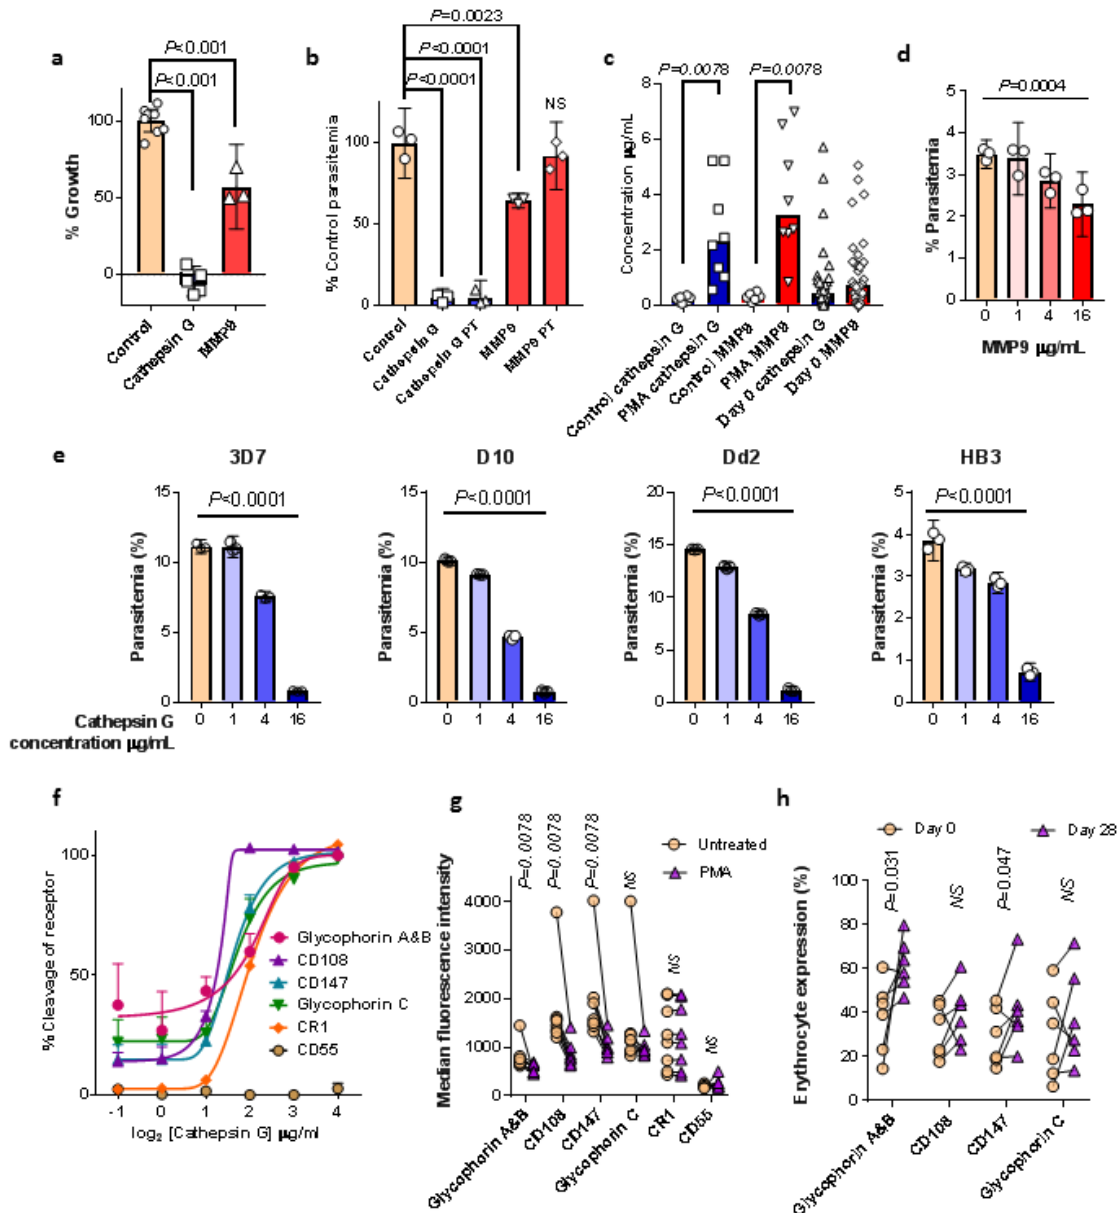

201

202 **Fig. 3 Effects of cathepsin G and MMP9 on parasite growth and expression of**  
 203 **erythrocyte invasion receptors**

204 (a) Effect of cathepsin G (18µg/mL) and MMP9 (16µg/mL) on *in vitro* growth (n=3-8  
 205 biological replicates, representative of two independent experiments). (b) Effect of cathepsin  
 206 G (18µg/mL) and MMP9 (18µg/mL) on erythrocyte invasion of *P. falciparum* 3D7 when  
 207 added directly to schizonts and donor red cells, or when pre-incubated (PT) with donor red

208 cells before washing and adding to schizonts (n=3 biological replicates per condition,  
209 representative of two independent experiments). **(a,b)** Show mean (95% CI) and *P* for  
210 unpaired t-test. **(c)** Cathepsin G and MMP9 concentrations in plasma from healthy donor  
211 whole blood (n=8) unstimulated or stimulated with 1 $\mu$ M PMA, and from Gambian children  
212 with *P. falciparum* malaria (n=34). Bars show median, *P* for Wilcoxon matched pairs test. **(d,**  
213 **e)** Dose response for growth inhibition by MMP9 against *P. falciparum* 3D7 and **(d)** and for  
214 invasion inhibition using cathepsin G pre-treated RBCs against four parasite strains (n=3  
215 biological replicates per dose, mean (95% CI) and *P* for linear trend, representative of two  
216 independent experiments). **(f)** Dose response for erythrocyte surface receptor cleavage by  
217 cathepsin G (n=3 biological replicates per dose, mean +/- standard error, asymmetric 5-  
218 parameter logistic regression fit lines, representative of two experiments). **(g)** Effect of PMA  
219 stimulation of healthy donor (n=8) whole blood on erythrocyte surface receptor expression  
220 assessed by fluorescence intensity (*P* for Wilcoxon matched pairs test). **(h)** Comparison of  
221 proportion of erythrocytes with detectable receptor expression in acute (day 0) and  
222 convalescent (day 28) samples from Gambian children with malaria (n=6, *P* for one-sided  
223 Wilcoxon test).

224

225 Having shown that mechanisms of host resistance can be identified from their correlation  
226 with PGI, we asked whether we could also identify mechanisms controlling  $m$ . In our model,  
227  $m$  may be influenced by constitutive factors but should be independent of any parasite load-  
228 dependent host response. Therefore we sought to confirm expected associations with two  
229 constitutive host factors known to influence parasite growth: iron<sup>29</sup> and complement factor H  
230 (FH)<sup>30,31</sup>. Since we did not have premorbid blood samples we used convalescent blood,  
231 collected 28 days after treatment, as a proxy for pre-infection status (Supplementary Dataset).  
232 Iron deficiency is protective against malaria<sup>32</sup> and reduces parasite multiplication *in vitro*<sup>29</sup>.  
233 Consistent with this, levels of hepcidin (a regulator of iron metabolism and marker of iron  
234 sufficiency or deficiency<sup>33</sup>) were significantly correlated with  $m$  ( $r=0.27$ ,  $P= 0.009$ ) in 92  
235 children who had not received blood transfusion (Extended Data Figure 3). FH is a  
236 constitutive negative regulator of complement activation which protects host cells from  
237 complement mediated lysis<sup>34</sup>. Many pathogens including *P. falciparum* have evolved FH  
238 binding proteins<sup>30,31</sup>, and FH protects blood-stage parasites from complement mediated  
239 killing *in vitro*<sup>30,31,34</sup>. In 14 children with additional day 28 plasma available (Supplementary  
240 Data Set) we found that FH was significantly correlated with  $m$  ( $r=0.66$ ,  $P = 0.01$ ) (Extended  
241 Data Figure 3). Thus, the quantitative estimates of parasite multiplication and PGI from our  
242 model exhibit the expected relationships with known constitutive determinants of parasite  
243 growth and this provides further evidence to support the validity of the method.

244 Using a model-based approach to estimate the within-host dynamics of pathogen load and its  
245 determinants in human infection we could estimate the relative contributions of parasite  
246 multiplication and host response to pathogen load measured at a single point in time, and we  
247 have used these predictions to identify mechanistic correlates of host resistance to malaria.  
248 Our approach is based on assumptions which are reasonable, but largely unverifiable, and  
249 alternative approaches are possible. However, our biological validation suggests that the

250 relative estimates of  $m$  and PGI are accurate enough to be useful, providing proof-of -  
251 principle that pathogen load dynamics can be estimated in humans. Our approach could be  
252 refined and expanded to identify additional biological determinants of pathogen load such as  
253 genetic correlates of  $m$  and  $P_c$ , or serological correlates of  $m$  and PGI. This has the potential  
254 to yield further novel insights into host-pathogen interactions in malaria, to facilitate  
255 discovery of new therapeutic and vaccine strategies, and improve predictive modelling of  
256 their impact on disease. Our findings indicate leads for development of host-directed  
257 therapeutics to augment antimalarial treatment, particularly in the setting of drug resistant  
258 parasites. Inhibition of type-1 interferon or CXCL10 signalling is a realistic option with  
259 inhibitory antibodies and small molecules already in development for other indications<sup>35,36</sup>.  
260 The therapeutic potentials of cathepsin G and MMP9 may be counterbalanced by risk of  
261 collateral tissue damage, but selective targeting of receptors on the erythrocyte surface may  
262 be a useful paradigm for both treatment and prevention of malaria.

263

264 **Extended Data Table 1. Characteristics of 139 Gambian children with malaria**

|                                           | Uncomplicated malaria | Prostrated<br>(SM1) | CM/SA/LA<br>(SM2) † | All severe malaria<br>(SM1 and SM2) | <i>P</i><br>(uncomplicated<br>vs. all severe<br>malaria) |
|-------------------------------------------|-----------------------|---------------------|---------------------|-------------------------------------|----------------------------------------------------------|
| <i>n</i>                                  | 64                    | 36                  | 39                  | 75                                  |                                                          |
| Female/male                               | 32/32                 | 14/22               | 17/22               | 31/44                               | 0.393                                                    |
| Sickle screen positive/negative§          | 0/59                  | 0/35                | 2‡/37               | 2/72                                | 0.502                                                    |
| Age (years)                               | 7 (5-10)              | 4.25 (3-6)          | 4.75 (3-6)          | 4.5 (3-6)                           | 7.89x10 <sup>-6</sup>                                    |
| Duration of illness (days)                | 3 (2-4)               | 2.5 (2-4)           | 2.5 (2-3)           | 2.5 (2-3)                           | 0.092                                                    |
| White cell count (x10 <sup>9</sup> / L) _ | 7.9 (5.6-9.5)         | 6.75(5.8-9.6)       | 9.1 (6.45-11.65)    | 7.7 (6.1-10.9)                      | 0.329                                                    |
| Hb (g/ dL)*                               | 11.39 (10.9-11.9)     | 10.35 (9.70-11.0)   | 8.72 (7.88-9.55)    | 9.6 (8.94-10.05)                    | NA                                                       |
| Platelets (x10 <sup>9</sup> / L) ¶        | 109 (80-162)          | 61 (34-101)         | 49 (36-93)          | 55 (35-95.5)                        | 1.06x10 <sup>-5</sup>                                    |
| Lactate (mmol/ L)                         | 2.2 (1.4-3.1)         | 3.0 (2.4-3.9)       | 6.1 (5.3-7.4)       | 4.4 (3.0-6.2)                       | NA                                                       |
| Parasite Density (x10 <sup>4</sup> / µl)  | 21.4 (7.2-35.8)       | 29.2 (11.8-47.1)    | 38.9 (21.7-63.9)    | 34.1 (17.1-58.3)                    | 2.70x10 <sup>-3</sup>                                    |
| <i>Pf</i> HRP2 (ng/ mL)                   | 123.4 (62.9-186.7)    | 191 (134-277)       | 319 (166-752)       | 236.9 (144.4-401.6)                 | 8.07x10 <sup>-7</sup>                                    |
| Parasite clones§                          | 2 (1-2)               | 2 (1-2)             | 2 (1-2)             | 2 (1-2)                             | 0.49                                                     |
| ln (total parasite biomass / Kg)*         | 23.2 (22.9-23.4)      | 23.8 (23.5-24.1)    | 24.6 (24.2-25.0)    | 24.1 (23.56-24.76)                  | 1.45x10 <sup>-7</sup>                                    |
| TNF (pg/ mL)                              | 5.6 (5.0-17.6)        | 10.3 (5.2-18.7)     | 11.6 (5.4-30.4)     | 10.8 (5.1-21.7)                     | 0.029                                                    |
| IL-10 (pg/ mL) _                          | 460.7 (76.2-961.8)    | 464.4 (179.8-1101)  | 630.1 (184.1-1865)  | 525.6 (180.2-1536)                  | 0.131                                                    |

265 Values are median (IQR) or mean\* (95% CI), unless otherwise stated.

266 *P* for Mann-Witney, unpaired two-sided *t*-test, or Chi-squared test as appropriate; not applicable (NA) for defining features of SM.

267 *Pf*HRP2, *P. falciparum* histidine rich protein 2.

268 †Cerebral malaria (CM) only, *n* = 3; CM plus hyperlactatemia (LA), *n* = 8; severe anemia (SA) only, *n* = 3; CM plus SA plus LA, *n* = 1; LA only, *n* =  
269 24; 3 fatalities.

270 ‡One HbSC; one did not have confirmatory hemoglobin electrophoresis.

271 §missing data for 6 subjects, \_ missing data on 3 subjects, ¶ missing data on 4 subjects

272



273 **Extended Data Table 2. Model parameters and assumptions**

| Parameter     | Explanation                                                                                                                                                                                                                                                                                                                                                                                                                                                                                                                                                                 | Assumptions                                                                                                                                                                                                                                                                                                                                                                                                                                                                                                   |
|---------------|-----------------------------------------------------------------------------------------------------------------------------------------------------------------------------------------------------------------------------------------------------------------------------------------------------------------------------------------------------------------------------------------------------------------------------------------------------------------------------------------------------------------------------------------------------------------------------|---------------------------------------------------------------------------------------------------------------------------------------------------------------------------------------------------------------------------------------------------------------------------------------------------------------------------------------------------------------------------------------------------------------------------------------------------------------------------------------------------------------|
| Parasite load | The total number of blood-stage malaria parasites within the body (parasite biomass) per Kg body weight. This includes circulating and sequestered parasites and is estimated from the concentration of PfHRP2 in plasma <sup>37</sup> .                                                                                                                                                                                                                                                                                                                                    | <ol style="list-style-type: none"> <li>1. Malariatherapy patients had uncomplicated malaria; their total body parasite load is 9% greater than would be predicted from their circulating parasite density<sup>37</sup>; their weight is 70kg<sup>38</sup>.</li> <li>2. After every 48hr parasite replication cycle, parasite biomass increases by the product of the parasite multiplication rate and the proportion of parasites surviving the parasite load-dependent host response<sup>4</sup>.</li> </ol> |
| $m$           | Within-host parasite multiplication rate. The number of new parasites that will be produced at the end of the 48hr erythrocytic cycle, in the absence of any reduction caused by parasite load-dependent mechanisms. This may vary between subjects due to intrinsic properties of the parasite, or constitutive host factors.                                                                                                                                                                                                                                              | <ol style="list-style-type: none"> <li>1. Remains constant throughout infection in any given individual<sup>4</sup></li> <li>2. Varies between individuals<sup>4</sup></li> </ol>                                                                                                                                                                                                                                                                                                                             |
| $P_c$         | The parasite load required to stimulate a host response which reduces by 50% the number of parasites surviving to the end of the replication cycle (50% parasite killing). This may vary between individuals, and reflects the cumulative effect of variations in the immune response, its regulation, and any other parasite load-dependent changes in the host environment which impede parasite survival (for example, the ability to produce new red blood cells in response to anemia, or resource limitations due to alterations in the biochemical milieu of blood). | <ol style="list-style-type: none"> <li>1. Remains constant throughout infection in any given individual<sup>4</sup></li> <li>2. Varies between individuals<sup>4</sup></li> <li>3. Explains all of the effect of the host response on parasite load prior to the peak of parasitemia</li> </ol>                                                                                                                                                                                                               |
| Tumor         | The plasma concentration of TNF (pg/mL)                                                                                                                                                                                                                                                                                                                                                                                                                                                                                                                                     | <ol style="list-style-type: none"> <li>1. TNF is a determinant of parasite killing in <math>P</math>.</li> </ol>                                                                                                                                                                                                                                                                                                                                                                                              |

---

|                      |                                                                   |                                                                                                                                                                                                                                                                                                                                                                                                                                 |
|----------------------|-------------------------------------------------------------------|---------------------------------------------------------------------------------------------------------------------------------------------------------------------------------------------------------------------------------------------------------------------------------------------------------------------------------------------------------------------------------------------------------------------------------|
| necrosis             |                                                                   | <i>falciparum</i> malaria <sup>5</sup>                                                                                                                                                                                                                                                                                                                                                                                          |
| factor, TNF          |                                                                   | 2. TNF concentration is associated with the strength of the host response. In conjunction with parasite load, it can be used to estimate $P_c$                                                                                                                                                                                                                                                                                  |
| Fever threshold      | The parasite load required to trigger a fever                     | 1. Varies between individuals <sup>4</sup> .<br>2. Is a consequence of the host response, and therefore correlates with $P_c$                                                                                                                                                                                                                                                                                                   |
| Time to presentation | The time from onset of clinical symptoms to arrival at the clinic | 1. This is the same as the duration of fever, recorded at presentation.<br>2. There is stochastic variation in time between onset of fever and presentation to clinic.<br>3. The likelihood of seeking treatment on any day increases with risk of severe disease.                                                                                                                                                              |
| Risk of severity     | The risk of severe malaria (any clinical phenotype)               | 1. Severe malaria is likely to be over-represented in the Gambian dataset due to referral bias (subjects were recruited from hospitals rather than primary healthcare facilities). Approximately 5% of malaria cases are expected to be severe in a relatively low transmission setting where children have had few previous episodes of malaria <sup>39</sup> .<br>2. Likelihood of severe disease is related to parasite load |

---

274

275

276 **Extended Data Table 3. Comparison of general additive models to predict  $m$  and  $P_c$**

| <b>Outcome Variable</b> | <b>Predictors in model</b>  | <b>Estimated degrees of freedom</b> | <b>Reference degrees of freedom</b> | <b>F</b>     | <b>P</b>                                  | <b>Deviance Explained (%)</b> |
|-------------------------|-----------------------------|-------------------------------------|-------------------------------------|--------------|-------------------------------------------|-------------------------------|
| <i>m</i>                | Duration of Symptoms        | 6.75                                | 7.88                                | 81.9         | $<2 \times 10^{-16}$                      | 39.9                          |
|                         | In TNF                      | 7.34                                | 8.32                                | 140          | $<2 \times 10^{-16}$                      |                               |
|                         | In Parasite Biomass         | 1                                   | 1                                   | 2.05         | 0.152                                     |                               |
| <b><i>m</i></b>         | <b>Duration of Symptoms</b> | <b>6.73</b>                         | <b>7.88</b>                         | <b>59.4</b>  | <b><math>&lt;2 \times 10^{-16}</math></b> | <b>34.1</b>                   |
|                         | <b>In TNF</b>               | <b>6.23</b>                         | <b>7.37</b>                         | <b>136</b>   | <b><math>&lt;2 \times 10^{-16}</math></b> |                               |
| <i>m</i>                | Duration of Symptoms        | 4.08                                | 5.10                                | 4.44         | 0.00047                                   | 4.64                          |
|                         | In Parasite Biomass         | 4.33                                | 5.43                                | 15.6         | $7.6 \times 10^{-16}$                     |                               |
| <i>m</i>                | In TNF                      | 5.34                                | 6.45                                | 61.5         | $<2 \times 10^{-16}$                      | 19.7                          |
|                         | In Parasite Biomass         | 3.10                                | 3.95                                | 3.74         | 0.00517                                   |                               |
| <b><math>P_c</math></b> | <b>Duration of Symptoms</b> | <b>8.59</b>                         | <b>8.95</b>                         | <b>364.9</b> | <b><math>&lt;2 \times 10^{-16}</math></b> | <b>90.2</b>                   |
|                         | <b>In TNF</b>               | <b>8.68</b>                         | <b>8.97</b>                         | <b>126.8</b> | <b><math>&lt;2 \times 10^{-16}</math></b> |                               |
|                         | <b>In Parasite Biomass</b>  | <b>2.01</b>                         | <b>2.58</b>                         | <b>6824</b>  | <b><math>&lt;2 \times 10^{-16}</math></b> |                               |

277 All predictors were incorporated into the model as additive smoothed terms. The best models  
 278 are in bold type.

279 **Extended Data Table 4.** Characteristics of subjects used for RNA sequencing

|                                          | UM               | SM                |
|------------------------------------------|------------------|-------------------|
| <i>n</i>                                 | 13               | 10                |
| Female/male                              | 5/8              | 3/7               |
| Sickle screen positive/negative          | 0/12             | 1 <sup>§</sup> /9 |
| Age (years)                              | 8 (4-10)         | 4.6 (3.3-5)       |
| Duration of illness (days)               | 2 (2-3)          | 2.25 (2.0-2.9)    |
| White cell count (x10 <sup>9</sup> / L)  | 8.6 (7.3-10.6)   | 10.2 (8.8-11.6)   |
| Hemoglobin (g/ dL)                       | 10.8 (10.5-12.4) | 7.8 (6.8-9.8)     |
| Platelets (x10 <sup>9</sup> / L)         | 123 (104-132)    | 53 (41-114)       |
| Lactate (mmoV/ L)                        | 2.2 (1.6-3.0)    | 5.8 (4.4-10.3)    |
| Parasite Density (x10 <sup>4</sup> / μl) | 23 (20.8-35.2)   | 24.1 (13.6-27.9)  |
| <i>Pf</i> HRP2 (ng/ mL)                  | 163 (128-187)    | 589 (209-2030)    |
| Parasite clones*                         | 2 (1-2)          | 1 (1-2)           |
| ln (total parasite biomass / Kg)         | 23.4 (23.3-23.7) | 25.1 (24.1-26.3)  |
| TNF (pg/ mL)                             | 5.0 (5.0-12.1)   | 11.2 (5.6-16.0)   |
| IL-10 (pg/ mL)                           | 651 (252-1900)   | 429 (201-1090)    |
| Estimated ln <i>P<sub>c</sub></i>        | 11.8 (10.9-12.0) | 13.3 (11.9-13.5)  |
| Estimated <i>m</i>                       | 12.5 (12.5-14.2) | 13.5 (12.3-15.6)  |
| Estimated PGI                            | 0.69 (0.55-0.75) | 0.71 (0.57-0.82)  |

280 For continuous data values are median (interquartile range). <sup>§</sup>HbSC, \*data available for 11 UM and 9 SM.

281

282 **Extended Data Table 5.** Most enriched gene ontology (GO) biological process terms

| GO term    | Description                                     | Number of genes in background | Number of genes positively correlated with PGI | Enrichment <i>P</i>       | Number of genes negatively correlated with PGI | Enrichment <i>P</i>          |
|------------|-------------------------------------------------|-------------------------------|------------------------------------------------|---------------------------|------------------------------------------------|------------------------------|
| GO:0015711 | organic anion transport                         | 183                           | 4                                              | <b>0.0001</b><br><b>7</b> | 1                                              | 0.47                         |
| GO:0061615 | glycolytic process through fructose-6-phosphate | 18                            | 2                                              | <b>0.0003</b><br><b>6</b> | 0                                              | 1                            |
| GO:0035606 | peptidyl-cysteine S-trans-nitrosylation         | 2                             | 1                                              | <b>0.0032</b>             | 0                                              | 1                            |
| GO:0035092 | sperm chromatin condensation                    | 2                             | 1                                              | <b>0.0032</b>             | 0                                              | 1                            |
| GO:0051186 | cofactor metabolic process                      | 243                           | 3                                              | <b>0.0064</b>             | 0                                              | 1                            |
| GO:0002396 | MHC protein complex assembly                    | 5                             | 0                                              | 1                         | 4                                              | <b>5.7 x10<sup>-10</sup></b> |

|            |                                                     |      |   |       |    |                                        |
|------------|-----------------------------------------------------|------|---|-------|----|----------------------------------------|
| GO:0034097 | response to<br>cytokine                             | 523  | 1 | 0.58  | 11 | <b>7.17</b><br><b>x10<sup>-7</sup></b> |
| GO:0045087 | innate immune<br>response                           | 747  | 4 | 0.028 | 12 | <b>3.41</b><br><b>x10<sup>-6</sup></b> |
| GO:0002376 | immune system<br>process                            | 1733 | 4 | 0.30  | 17 | <b>1.33</b><br><b>x10<sup>-5</sup></b> |
| GO:0032649 | regulation of<br>interferon-<br>gamma<br>production | 54   | 0 | 1     | 3  | <b>0.00080</b>                         |

283 The five most enriched, non-redundant biological process terms were determined using

284 REVIGO for genes positively or negatively associated with parasite growth inhibition

285

286 **Extended Data Table 6.** Antibodies used to assess erythrocyte surface receptor expression

287

| <b>Antibody, Clone</b>                                                                      | <b>Isotype control</b>                             |
|---------------------------------------------------------------------------------------------|----------------------------------------------------|
| APC Mouse anti-human CD235ab Antibody,<br>Clone HIR2 (Biolegend)                            | APC Mouse IgG2b, $\kappa$ (Biolegend)              |
| PE Mouse anti-human CD108 Antibody, Clone<br>MEM-150 (Biolegend)                            | PE Mouse IgM, $\kappa$ (Biolegend)                 |
| Alexa Fluor® 488 Mouse anti-human CD147<br>Antibody, Clone HIM6 (Biolegend)                 | Alexa Fluor® 488 Mouse IgG1, $\kappa$ (Biolegend)  |
| Alexa Fluor® 405 Mouse anti-human<br>Glycophorin C Antibody (BRIC10) (Novus<br>Biologicals) | Alexa Fluor® 405 Mouse IgG1 (Novus<br>Biologicals) |
| PE Mouse anti-human CD35 Antibody (CR1),<br>Clone E11 (Biolegend)                           | PE Mouse IgG1 (Biolegend)                          |
| FITC Mouse anti-Human CD55 Clone IA10<br>(RUO) (BD Biosciences)                             | FITC Mouse IgG2a, $\kappa$ (BD Biosciences)        |

288

289

290 **Extended Data Figures**

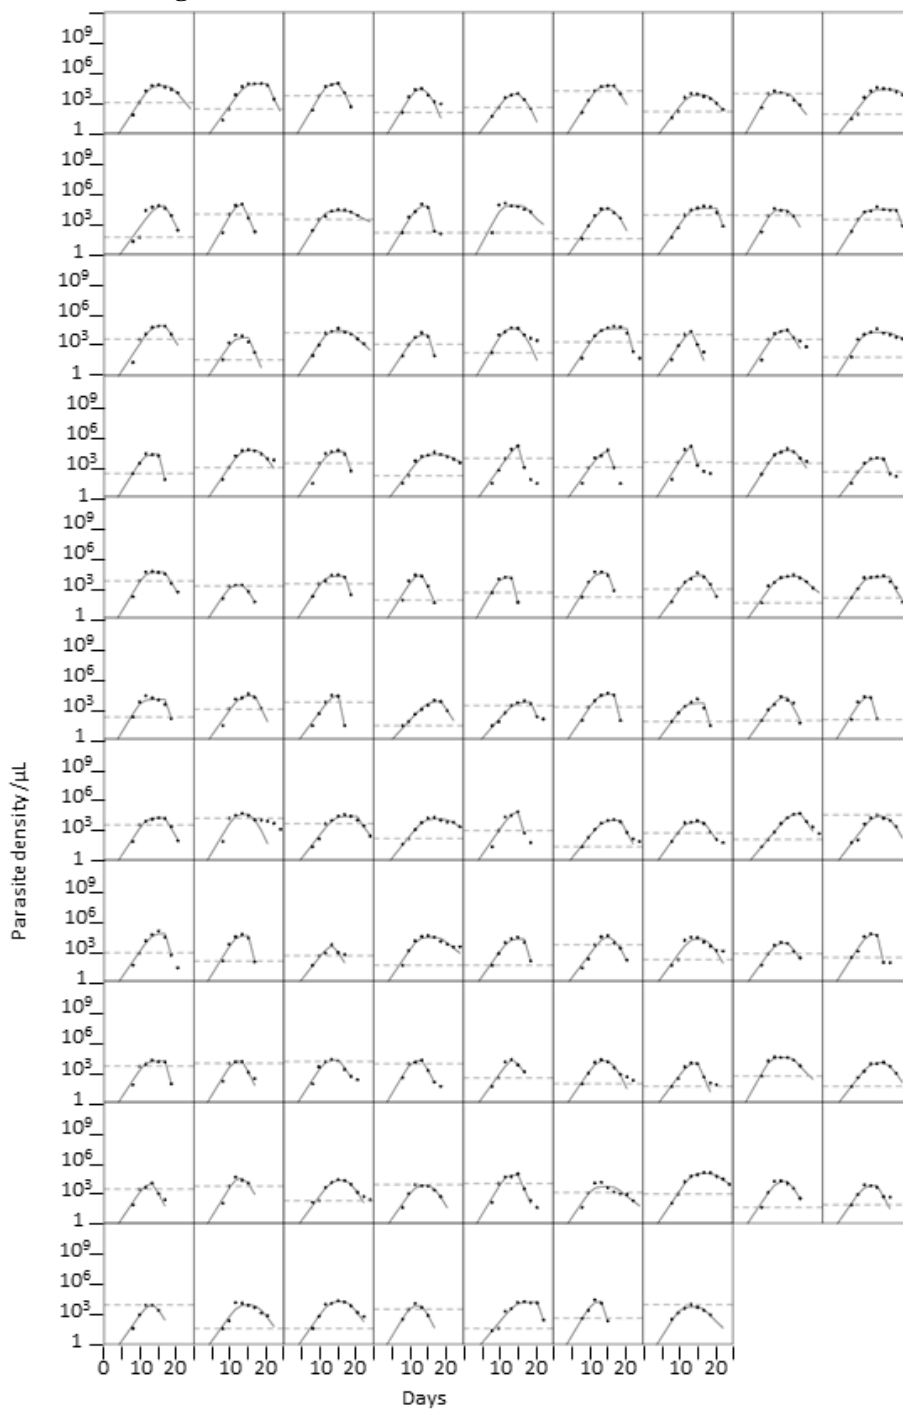

**Extended Data Figure 1. The dynamics of pathogen load in malariatherapy patients.** Change in parasite density over time (for the first wave of parasitemia in 97 malariatherapy patients. Each plot represents one subject. Dots indicate observed parasite densities on alternate days; dashed line, observed fever threshold; solid line, fit of modelled trajectory of parasite density.



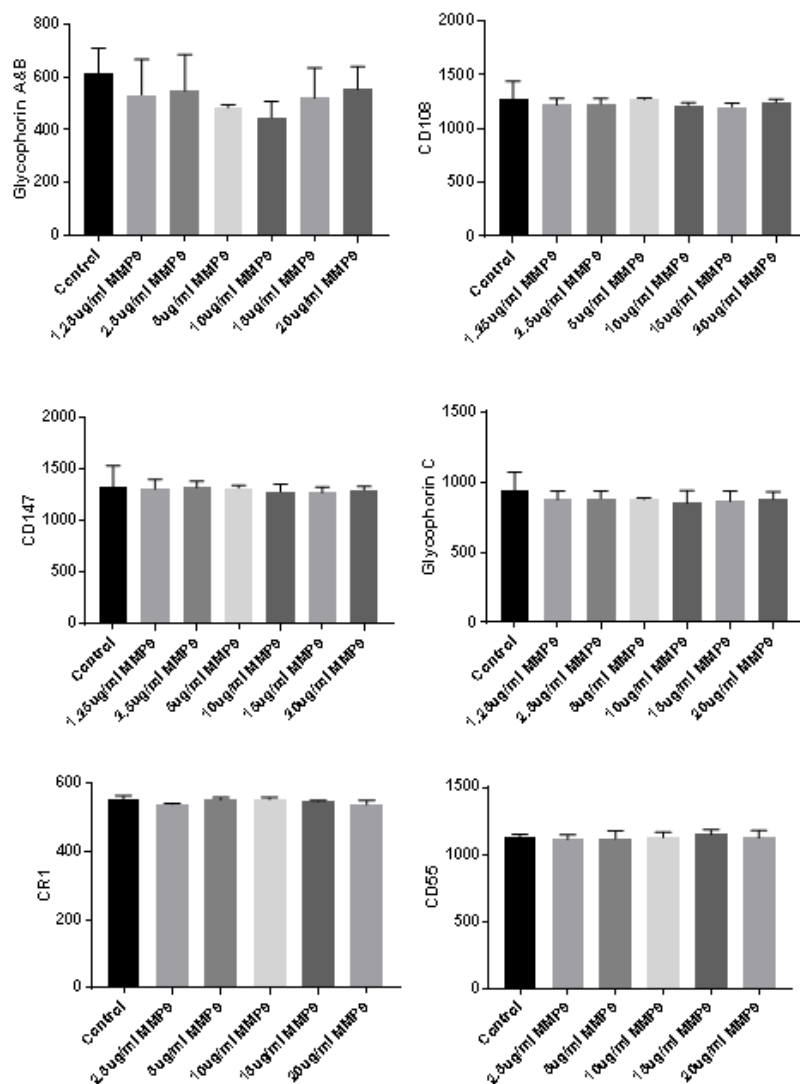

**Extended Data Fig. 2 Effect of MMP9 treatment on erythrocyte surface receptors.**

Median fluorescent intensity of erythrocyte surface molecule expression following MMP9 treatment (n=3 biological replicates per condition, mean and range). None were significantly different to the control condition using t-test.

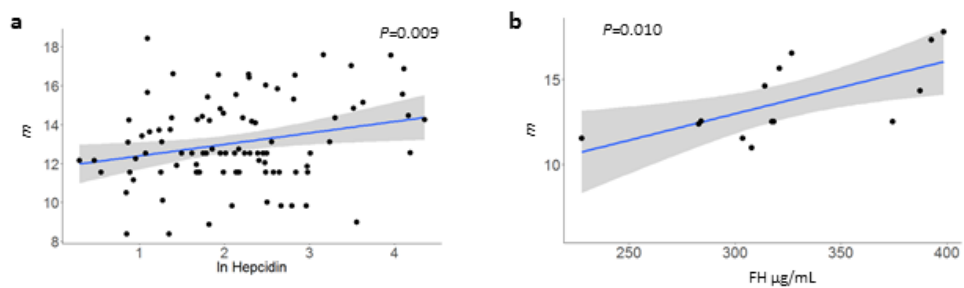

**Extended Data Fig. 3 Correlates of parasite multiplication rate**

(a, b) Predicted parasite multiplication rate,  $m$ , was correlated with hepcidin concentration (a,  $n=92$ ) and complement factor H (FH) concentration (b,  $n=14$ ) in convalescent plasma obtained from children 28 days after treatment for malaria. Blue line, linear regression; grey shading, 95% CI;  $P$ , Pearson correlation.

293

294

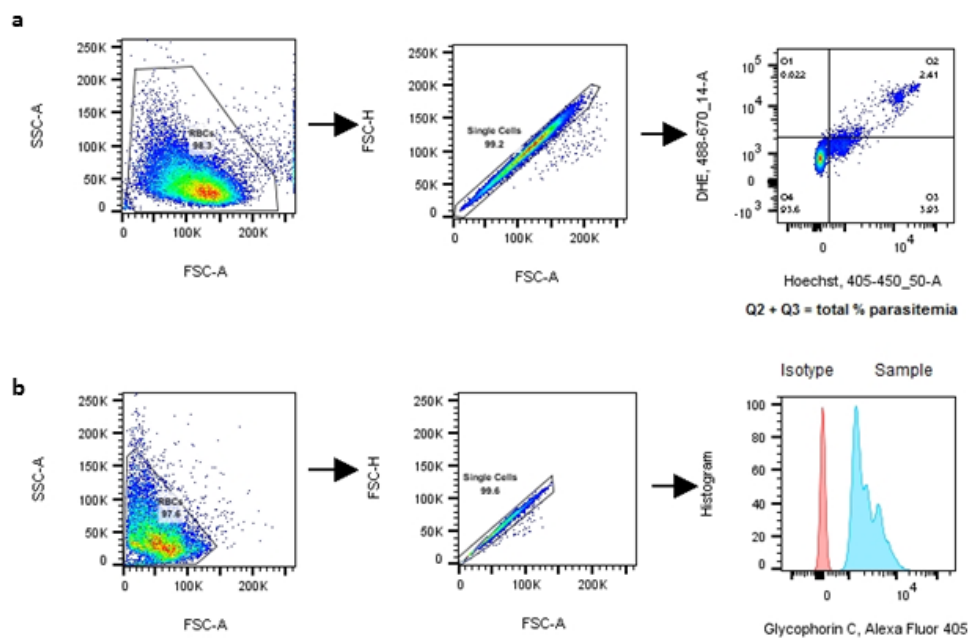

**Extended Data Fig. 4 Gating strategies for flow cytometry analyses**

(a) Gating for determination of parasitemia by flow cytometry based on staining of infected red blood cell with dihydroethidium (DHE) and Hoechst. (b) Gating on red blood cells for determination of surface molecule expression by fluorescence intensity (example of glycophorin C fluorescence compared with isotype fluorescence).

## 296 **Materials and Methods**

### 297 **Subjects and laboratory assays**

298 We used data from all of the malariatherapy patients reported by Dietz et al.<sup>4</sup> and from all  
299 139 Gambian subjects reported in our previous studies<sup>37,40,41</sup> who had all of the following  
300 data available: age, parasite biomass estimate, plasma TNF concentration, duration of illness  
301 and severity of illness. No subjects were excluded after this selection, and all available data  
302 was included in analyses, without any exclusion of outliers. As described previously<sup>37,40,41</sup>,  
303 Gambian children (<16 years old) were recruited with parental consent from three peri-urban  
304 health centres in the Greater Banjul region, from August 2007 through January 2011 as part  
305 of a study approved by the Gambia Government/MRC Laboratories Joint Ethics Committee,  
306 and the Ethics Committee of the London School of Hygiene and Tropical Medicine. *P.*  
307 *falciparum* malaria was defined by compatible clinical symptoms in the presence of  $\geq 5000$   
308 asexual parasites/ $\mu\text{L}$  blood, and any children suspected or proven to have bacterial co-  
309 infection were excluded. Severe malaria was specifically defined by the presence of  
310 prostration (SM1) or any combination of three potentially overlapping syndromes (cerebral  
311 malaria (CM), severe anemia (SA, hemoglobin  $< 5$  g/dL), and hyperlactatemia (blood lactate  
312  $> 5$  mmol/L) - collectively SM2)<sup>37,41,42</sup>. Clinical laboratory assays, measurements of plasma  
313 TNF and IL-10 by Luminex, measurements of gene expression by RT-PCR, and estimation  
314 of total parasite biomass from *Pf*HRP2 ELISA have been previously described<sup>37,41</sup>. Subject-  
315 level data from these Gambian children is available as **Supplementary Dataset**.

316

### 317 **Statistical analyses**

318 Statistical analyses were undertaken using the R statistical software<sup>43</sup> and GraphPad Prism  
319 (GraphPad Software, Inc.). Continuous variables were compared between groups using  
320 unpaired or paired student's t-test (when normally distributed) and the Mann-Whitney-  
321 Wilcoxon or Wilcoxon matched pairs tests (when normal distribution could not be assumed),  
322 or ANOVA for comparison across multiple groups. Correlations were assessed using  
323 Pearson's correlation, after log transformation of the data if appropriate. All hypothesis tests  
324 were two-sided with  $\alpha = 0.05$ , unless specifically indicated otherwise. One-sided testing  
325 was only used when consistent with the *a priori* hypothesis. Associations between  
326 explanatory variables and latent variables were assessed using generalized additive models  
327 (GAM<sup>44</sup>, using the R package "mgcv") and explained variance was used to select the best  
328 GAM once all model terms were significant ( $P < 0.05$ ). Dose-response curves were fitted  
329 using asymmetrical sigmoidal five-parameter logistic equation in GraphPad Prism.

### 330 **Model relating parasite multiplication, host response and parasite load**

331 A process-based, stochastic simulation model was devised to reproduce the clinical data  
332 collected from the Gambian children. This was achieved by combining the information in the  
333 Gambian data with a model describing the first wave of parasitemia in non-immune adults  
334 who were deliberately infected with *P. falciparum* malaria to treat neurosyphilis  
335 ("malariatherapy")<sup>4</sup>. These malariatherapy data, from the pre-antibiotic era, are the main  
336 source of information on the within-host dynamics and between-host variation in the course  
337 of parasitemia in untreated malaria infections. The model of Dietz et al.<sup>4</sup> was modified and  
338 extended in order to be applied to the Gambian data.

339

340 *Model of ascending parasitemia in malariatherapy subjects.* The model relates parasite  
341 density after each 2-day asexual blood stage cycle ( $P_{(t+2)}$ ) to the parasite density at the end of  
342 the previous cycle ( $P_{(t)}$ ) by the following equation:

$$343 \quad P_{(t+2)} = P_{(t)} \cdot m \cdot S_{c(t)}$$

344 The host-specific parasite multiplication rate,  $m$ , is a property of both parasite and host,  
345 allowing for growth-inhibition by constitutive factors; the proportion of parasites that will  
346 survive the effects of the density-dependent host response in the present cycle is  $S_c$ :

$$347 \quad S_c(t) = \frac{1}{1 + \left(\frac{P(t)}{P_c}\right)^4}$$

348 , where  $P_c$  is the host-specific parasite load threshold at which the host response is strong  
349 enough to inhibit 50% of parasite growth in that cycle. Consistent with the original Dietz  
350 model,  $P_{(0)}$  was set to 0.003 parasites/ $\mu\text{l}^4$ .

351 The original Dietz model included an additional parameter,  $S_m$ , to help describe the decline in  
352 parasitemia after the peak of the first wave.  $S_m$  is the proportion of isogenic parasites  
353 surviving an additional density- and time-dependent host response, which might represent  
354 adaptive immunity<sup>4</sup>. Estimates of the range of values of  $S_m$  in the Dietz dataset and model  
355 were used when simulating data but since this parameter has little influence on parasite  
356 densities prior to the peak it was not used to make subsequent predictions of  $m$  and  $P_c$  in  
357 individual Gambian subjects.

358 At the explicit request of Klaus Dietz and Louis Molineaux, we hereby communicate the  
359 following correction regarding their assertion that the malariatherapy patients had not  
360 received any treatment<sup>4</sup>: it was later found that 47 of these patients had indeed received

361 subcurative treatment, and that those patients had significantly higher parasite densities. This  
362 is unlikely to influence our analysis, because treatment would only be provided when  
363 malariatherapy patients became very unwell, presumably at maximum parasitemia, whereas  
364 most patients with naturally acquired infection likely present prior to the peak parasitemia  
365 that might occur in the absence of treatment.

366 *Fitting of the malariatherapy model to data from Gambian children.* Individual-level  
367 parameter estimates for the malaria therapy dataset were kindly provided by Klaus Dietz. The  
368 logarithms of these 97 estimates of  $m$  and  $P_c$  were well described by a multivariate normal  
369 distribution, providing a quantitative description of inter-individual variation in the dynamics  
370 of the first wave of parasitemia. In order to use the Dietz model to simulate the Gambian  
371 data, a number of modifications and extensions were made. Some of these required  
372 estimation of additional parameters by comparing the model simulations with the Gambian  
373 data. Dietz et al. provided a statistical description of the parasite density at which first fever  
374 occurred (the “fever threshold”) in the form of the distribution of the ratio of threshold  
375 density to peak parasitemia. The median density at first fever was at 1.4% of peak density.  
376 We introduced the assumption that the onset of fever occurs at a particular threshold value of  
377  $S_c$ , because fever is dependent on the production of cytokines like interleukin-6 and TNF,  
378 both components of the host response. This constitutes a process-based model for the onset of  
379 fever rather than a purely statistical one. Because individuals differ in their response to  
380 parasite load (captured through variation in  $P_c$ ), this results in variation of parasite densities at  
381 first fever but ignores any potential variation among individuals with respect to host response  
382 at onset of fever. The host response threshold for the onset of fever  $S_c^f = 0.86$  was determined  
383 as the value of  $S_c$  calculated at 1.4% of the peak density of a simulated individual with the  
384 median parameter values. This yielded a distribution of fever ratios similar to the one  
385 described by Dietz et al. <sup>4</sup>, albeit with less variation.

386 To simulate the time between onset of fever and clinical presentation we made use of the self-  
387 reported duration of symptoms in the Gambian data. The model which was most consistent  
388 with these values assumed a gamma-distributed duration of symptoms in non-severe cases,  
389 and a possibility to present earlier in the case of more severe disease. Since parasite biomass  
390 is related to likelihood of having severe malaria<sup>37,38</sup> the probability of early presentation on  
391 any day after onset of fever was set proportional to the (density-dependent) probability of  
392 having severe disease on that day. Scale ( $\zeta$ ) and shape ( $\kappa$ ) parameters of the gamma  
393 distribution as well as the factor ( $\xi$ ) for determining the probability of early presentation were  
394 estimated from the Gambian data.

395 We assumed that TNF production  $\tau(t)$  increases monotonically with density dependent host  
396 response  $(1-S_e)$  and represented this relationship using a heuristic function of the form

397 
$$\tau(t) = a + b \left( 1 - \frac{1}{1 + \left( \frac{-\log(S_e(t))}{\lambda^*} \right)^\gamma} \right)$$

398 , with free parameters  $a$ ,  $b$ ,  $\lambda^*$  and  $\gamma$  estimated from the Gambian data.

399 The Gambian children had on average higher parasite densities than the malariatherapy  
400 patients, which led to a bad fit of the original model to the Gambian data. This was overcome  
401 by introducing the assumption that the Gambian children had a different range of values of  $P_c$   
402 to the adult malariatherapy patients. A factor  $\pi$  was therefore estimated by which the  $\ln P_c$   
403 value from the Dietz model was multiplied. This led to overall higher parasite densities upon  
404 presentation. However, our model uses parasite biomass and its relationship with disease  
405 severity to predict day of presentation, and there is an interaction between the mean  $\ln P_c$  and  
406 the variation in  $\ln P_c$ , as well as the proportion of severe malaria in the simulated Gambian  
407 population. Based on the relatively low malaria transmission in the Banjul area of The



408 Gambia, we assumed that severe cases (defined by the presence of any of: prostration,  
409 hyperlactatemia, severe anemia or cerebral malaria) were over-represented by hospital-based  
410 recruitment and that in an unselected population of children of similar age to those in our  
411 dataset only approximately 5% of all malaria infections would be severe<sup>39</sup>. Therefore we  
412 estimated a factor  $\delta$  by which the variance of  $\ln P_c$  should be multiplied such that both rate of  
413 severity as well as the distribution of parasite biomass matched well after fitting our  
414 simulation to the Gambian data.

415 The free parameters  $\zeta$ ,  $\kappa$ ,  $\xi$ ,  $a$ ,  $b$ ,  $\lambda^*$ ,  $\gamma$ ,  $\pi$  and  $\delta$ , together summarized as  $\theta$ , were estimated  
416 by fitting model simulations to the information on TNF, parasite density, and duration of  
417 symptoms, for any given candidate parameterization, a total of 139 clinically presenting  
418 individuals were simulated from the model, which corresponds to the size of the Gambian  
419 dataset. An objective function  $L(\theta)$  was calculated, and a simulated annealing algorithm  
420 (provided by the “optim” function in R) determined the value for  $\theta$  which maximizes this  
421 function. The log-likelihood  $L(\theta)$  was comprised of three separate objectives. The first  
422 objective represented the log-probability that the frequency of severe cases in the simulation  
423 was equal to an assumed 5%, employing a binomial likelihood, given the actual number of  
424 severe cases sampled in 139 simulated individuals. The second objective considered the  
425 overlap between the bivariate distribution of  $\ln$  parasite density vs.  $\ln$  TNF concentration in  
426 the simulated data compared to the Gambian dataset. An approximate numerical value for  
427 this partial log-likelihood was obtained as the log probability of the Gambian data (density  
428 and TNF) given a two-dimensional kernel density estimate of the simulation output as a  
429 likelihood model. Kernel density estimates were obtained using the “kde2d” function in the  
430 “MASS” package in R. In this calculation, the TNF/density data points of severe or prostrated  
431 Gambian patients entered the partial likelihood with a weight of 1/11, to account for the  
432 oversampling of severe cases in the Gambian data. The third objective concerned the two-

433 dimensional distribution of log density and duration since first fever. This partial log-  
434 likelihood was obtained using the same kernel-based approach described above, with weights  
435 of 1/11 for severe and prostrated cases. The overall log-likelihood  $L(\theta)$  was calculated as a  
436 weighted sum of the three partial log-likelihoods, with the log-probability of having the  
437 desired true severity rate weighted with a factor of 68, which ensured similar magnitude of  
438 the three partial log-likelihoods at the optimum.

439 The results of the fitting algorithm were visually confirmed to yield a good overlap of the  
440 joint distributions of density and biomass, the duration of symptoms, TNF and biomass  
441 between simulation and the Gambian children. Approximate confidence intervals for the  
442 parameter estimates were determined by employing a 2<sup>nd</sup> degree polynomial to estimate the  
443 curvature of the maximum simulated likelihood surface in the vicinity of the parameter point  
444 estimate, assuming independence of parameters.

445 As in the original model of Dietz et al.<sup>4</sup>, peripheral parasite densities were used to determine  
446 the dynamic changes in parasitemia, implying a correlation between peripheral densities and  
447 total parasite biomass. For the purpose of determining disease severity, total parasite biomass  
448 per kg was calculated from the predicted parasite density by the equation  $70,000 \times 1.09 \times$   
449 predicted parasite density in parasites/ $\mu$ L, as has been determined previously for  
450 uncomplicated malaria cases in the Gambian dataset<sup>37</sup>. The source code for the model and  
451 examples of its use are presented as **Supplementary Code File**.

452 *Deterministic relationships between real and latent variables.* The range of values of  $m$  and  
453  $\ln P_c$  in a simulated population of 2000 patients were determined and each divided into 50  
454 equally spaced increments in order to generate 2500 possible combinations of  $m$  and  $\ln P_c$  for  
455 which all model outcomes were determined. For the purpose of this analysis, the time-  
456 dependent adaptive immune response parameters (which comprise  $S_m$ ) were set for all

457 subjects at their respective population median values. The model of Dietz *et al.* makes use of  
458 discrete 2 day time intervals<sup>4</sup>, corresponding to the duration of the intraerythrocytic cycle in a  
459 highly synchronized infection. However, naturally acquired infections are rarely this  
460 synchronous<sup>38</sup> and the time since infection of our Gambian patients is an unknown  
461 continuous variable. In order to cope with this we assumed that the relationship between  
462 predicted outcome variables (parasite biomass, duration of illness and TNF concentration)  
463 and explanatory variables ( $m$  and  $P_c$ ) could be approximated by smoothed GAM<sup>44</sup>. We used  
464 the GAM to estimate values of  $m$ ,  $P_c$  and parasite growth inhibition (PGI,  $1-S_c$ ) in the  
465 Gambian children, based on their known total parasite biomass, duration of symptoms and  
466 TNF concentration.

467

#### 468 **RNA-sequencing and data analysis**

469 Total RNA was extracted using the PAXgene Blood RNA kit (BD) and quality assessed  
470 using the Agilent 6000 RNA Nano kit and Bioanalyzer. Library preparation and sequencing  
471 were performed by Exeter University sequencing service. Libraries were prepared from 1 $\mu$ g  
472 of total RNA using the ScriptSeq v2 RNA-seq library preparation kit (Illumina) with  
473 additional steps to remove ribosomal RNA (rRNA) and globin messenger RNA (mRNA) using  
474 Globin-Zero Gold kit (Epicentre). Strand-specific libraries were sequenced using the 2x100  
475 bp protocol with an Illumina HiSeq 2500. Samples were randomized for order of library  
476 preparation and then randomly allocated to sequencing lanes in a block design to ensure a  
477 balance of SM and UM samples (5-6 samples per lane) to eliminate batch effects. The  
478 reference genomes hg38 (<http://genome.ucsc.edu/>) and *P. falciparum* reference genome  
479 release 24 (<http://plasmodb.org/>) were used for human and parasite respectively. Human gene  
480 annotation was obtained from GENCODE (release 22) (<http://genencodegenes.org/releases/>)

481 and *P. falciparum* gene annotation from PlasmoDB (release 24) (<http://plasmodb.org>). RNA-  
482 seq data was mapped to the combined genomic index containing both human and *P.*  
483 *falciparum* genomes using splice-aware STAR aligner, allowing up to 8 mismatches for each  
484 paired-end read<sup>45</sup>. Reads were then extracted from the output BAM file to separate parasite-  
485 mapped reads from human-mapped reads. Reads mapping to both genomes were counted for  
486 each sample and removed. BAM files were also sorted, read groups replaced with a single  
487 new read group and all reads assigned to it, and indexed to run RNASeQC, a tool for  
488 computing quality control metrics for RNA-seq data<sup>46</sup>. Only exclusively human-mapped  
489 reads were used for further analysis. HTSeq-count was used to count the reads mapped to  
490 exons with the parameter “-m union”<sup>47</sup>. With the R package edgeR, raw read counts were  
491 normalized using a trimmed mean of M-values (TMM), which takes into account the library  
492 size and the RNA composition of the input data<sup>48</sup>. To account for inter-individual variation in  
493 the proportions of different types of blood leukocyte, deconvolution analysis was performed  
494 using CellCODE<sup>49</sup>. Leukocyte expression signatures were taken from the in-built Immune  
495 Response In Silico (IRIS<sup>50</sup>) dataset for: neutrophil, monocyte, CD4+ T-cell, CD8+ T-cell,  
496 and B-cell. Fragments Per Kilobase of transcript per Million mapped reads (FPKM) values  
497 were calculated from human RNA-seq data and log-transformed to simulate a microarray  
498 data set. Surrogate proportion variables for each sample were calculated for each of the cell  
499 types.

500 The association of gene expression with *m* and PGI was determined using a generalized linear  
501 model approach in edgeR, allowing adjustment for leukocyte SPVs. False discovery rate  
502 (FDR) was computed using the Benjamini-Hochberg approach and FDR below 0.05 was  
503 considered to be significant. Gene ontology (GO) terms were obtained from Bioconductor  
504 package “org.Hs.eg.db”. Fisher’s exact test was used to identify significantly over-  
505 represented GO terms from gene lists. The background gene sets consisted of all expressed

506 genes detected in the data set. Enrichment analysis for biological process terms was carried  
507 out using the "goana()" function in edgeR. REVIGO was used to identify the most significant  
508 non-redundant GO terms<sup>51</sup>. Using groups of genes significantly positively or negatively  
509 correlated with PGI, Ingenuity Pathway Analysis (Qiagen) was used to identify networks of  
510 genes functionally linked by regulators, interactions or downstream effects, which were  
511 visualized as radial plots centered around the most connected network member.

## 512 **Parasite culture, growth and invasion assays**

513 *P. falciparum* 3D7 strain was used in continuous culture for all of the experiments unless  
514 otherwise stated. Asexual blood stage parasites were cultured in human blood group A red  
515 cells, obtained from the National Blood Service, at 1-5% hematocrit, 37 °C, 5% CO<sub>2</sub> and low  
516 oxygen (1% or 5%) as described previously<sup>52,53</sup>. Growth medium was RPMI-1640 (without  
517 L-glutamine, with HEPES) (Sigma) supplemented with 5 g/L Albumax II (Invitrogen), 147  
518 μM hypoxanthine, 2 mM L-glutamine, and 10 mM D-glucose. Parasite developmental stage  
519 synchronization was performed using 5% D-sorbitol to obtain ring stage parasites or Percoll  
520 gradients for schizont stage enrichment<sup>53,54</sup>. For growth assays, schizonts were mixed at <1%  
521 parasitemia with uninfected erythrocytes at 2% final hematocrit. Cathepsin G (Abcam) or  
522 recombinant active MMP9 [Enzo] were added for 72 hour incubation to allow two replication  
523 cycles. Growth under each condition was calculated relative to the average growth in  
524 untreated samples. Invasion assays were performed by adding parasites synchronised at the  
525 schizont stage to target erythrocytes and incubating for 24 hours. Cathepsin G and MMP9  
526 were either pre-incubated with the target cells overnight followed by four washes with RPMI  
527 to completely remove them, or they were added directly to the culture of schizonts with target  
528 erythrocytes for 24 hours. The same protocol was followed for other *P. falciparum* strains  
529 except Dd2, for which magnetic purification was used to purify schizonts<sup>55</sup>.

530 **Flow cytometry for parasitemia and erythrocyte surface receptor expression**

531 Flow cytometry was performed using a BD LSR Fortessa machine and analysis was  
532 conducted using FlowJo v10 (TreeStar Inc.), and gating strategies are show in Extended Data  
533 Figure 4. To assess parasitemia, 1µl of sample at 50% hematocrit was stained with Hoechst  
534 33342 (Sigma) and dihydroethidium (Sigma) and then fixed with 2% paraformaldehyde  
535 (PFA) before flow cytometry as previously described<sup>56</sup>. Erythrocyte surface receptor  
536 expression was assessed by median fluorescence intensity of erythrocytes labelled with  
537 monoclonal antibodies or by comparison with isotype control antibodies (Extended Data  
538 Table 6). Briefly, erythrocytes were washed twice before resuspending at 50% haematocrit,  
539 of which 1-2µl was stained in 100µl of antibody cocktail in FACS buffer (2% fetal bovine  
540 serum, 0.01% sodium azide in PBS) for 30 minutes in the dark on ice. Samples were washed  
541 twice in FACS buffer and then fixed in 300µl FACS buffer with 2% paraformaldehyde.  
542 Surface receptor loss was calculated from the difference between the treated and untreated  
543 sample median fluorescent intensities after the isotype control antibody fluorescence had  
544 been subtracted.

545 **Whole blood stimulation and Cathepsin G and MMP9 ELISA**

546 Whole blood was collected from 8 healthy adult donors and plated at 25% hematocrit, and  
547 incubated overnight with or without 1µM PMA (Sigma). Supernatant was collected to  
548 perform Cathepsin G (CTSG ELISA Kit-Human, Aviva Systems Biology) and MMP9  
549 (Legend Max Human MMP-9, Biolegend) ELISAs, and erythrocytes were collected for  
550 surface staining. The same ELISA kits were used to measure cathepsin G and MMP9 in acute  
551 (day 0) plasma samples from children with malaria.

552 **Hepcidin and Complement Factor H ELISA**

553 The hepcidin concentration was measured 28 days after infection in plasma from subjects  
554 who had not received blood transfusion using the Hepcidin-25 bioactive ELISA kit (DRG)  
555 according to the manufacturer's instructions, with duplicate measurements when sufficient  
556 plasma was available. Complement Factor H assays were performed using an in-house  
557 ELISA as described<sup>57</sup>.

#### 558 **Data availability**

559 Estimates of parameters determining within-host dynamics in malariatherapy dataset were  
560 obtained from reference 4, whose corresponding author may be contacted at klaus.dietz@uni-  
561 tuebingen.de. Data from the Gambian subjects are presented as Supplementary Dataset.  
562 RNA-seq data have been deposited in the ArrayExpress database at EMBL-EBI  
563 ([www.ebi.ac.uk/arrayexpress](http://www.ebi.ac.uk/arrayexpress)) under accession number E-MTAB-6413.

#### 564 **Code availability**

565 The source code for the mathematical model, and examples of its use, are presented as  
566 Supplementary material.

567

568 **Supplementary Materials**

569 **Supplementary Fig 1. Fit of TNF concentration to parasite growth inhibition.**

570 **Supplementary Dataset. Data from the Gambian children with malaria.**

571 **Supplementary Code Zip File. Containing README file, R library file for the**

572 **mathematical model, R Example file for the mathematical model.**

573

574



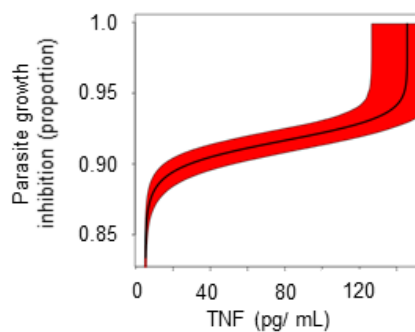

**Supplementary Fig. 1. Fit of TNF concentration to parasite growth inhibition.** Parameter estimation during model fitting suggested that TNF would increase above the limit of detection at a relatively late stage in the host response, when it would augment parasite killing (approximate 95% confidence interval in red)

576 **References:**

- 577 1 Plotkin, S. A. Complex correlates of protection after vaccination. *Clin Infect Dis* **56**,  
578 1458-1465 (2013).
- 579 2 Zumla, A. *et al.* Host-directed therapies for infectious diseases: current status, recent  
580 progress, and future prospects. *Lancet Infect Dis* **16**, e47-63 (2016).
- 581 3 Cunningham, A. J. The importance of pathogen load. *PLoS Pathog* **11**, e1004563,  
582 doi:10.1371/journal.ppat.1004563 (2015).
- 583 4 Dietz, K., Raddatz, G. & Molineaux, L. Mathematical model of the first wave of  
584 Plasmodium falciparum asexual parasitemia in non-immune and vaccinated  
585 individuals. *Am J Trop Med Hyg* **75**, 46-55 (2006).
- 586 5 Kumaratilake, L. M., Ferrante, A. & Rzepczyk, C. M. Tumor necrosis factor enhances  
587 neutrophil-mediated killing of Plasmodium falciparum. *Infect Immun* **58**, 788-793  
588 (1990).
- 589 6 Kumaratilake, L. M. *et al.* A synthetic tumor necrosis factor-alpha agonist peptide  
590 enhances human polymorphonuclear leukocyte-mediated killing of Plasmodium  
591 falciparum in vitro and suppresses Plasmodium chabaudi infection in mice. *J Clin*  
592 *Invest* **95**, 2315-2323, doi:10.1172/JCI117923 (1995).
- 593 7 Smith, T. *et al.* Relationships between Plasmodium falciparum infection and  
594 morbidity in a highly endemic area. *Parasitology* **109 ( Pt 5)**, 539-549 (1994).
- 595 8 White, N. J. *et al.* Malaria. *Lancet* **383**, 723-735 (2014).
- 596 9 Crompton, P. D. *et al.* Malaria immunity in man and mosquito: insights into unsolved  
597 mysteries of a deadly infectious disease. *Annu Rev Immunol* **32**, 157-187 (2014).
- 598 10 Ceesay, S. J. *et al.* Continued decline of malaria in The Gambia with implications for  
599 elimination. *PLoS One* **5**, e12242, doi:10.1371/journal.pone.0012242 (2010).

- 600 11 Okebe, J. *et al.* School-based countrywide seroprevalence survey reveals spatial  
601 heterogeneity in malaria transmission in the Gambia. *PLoS One* **9**, e110926,  
602 doi:10.1371/journal.pone.0110926 (2014).
- 603 12 Arthur, J. S. & Ley, S. C. Mitogen-activated protein kinases in innate immunity. *Nat*  
604 *Rev Immunol* **13**, 679-692, doi:10.1038/nri3495 (2013).
- 605 13 Manning, B. D. & Toker, A. AKT/PKB Signaling: Navigating the Network. *Cell* **169**,  
606 381-405 (2017).
- 607 14 Spaulding, E. *et al.* STING-Licensed Macrophages Prime Type I IFN Production by  
608 Plasmacytoid Dendritic Cells in the Bone Marrow during Severe *Plasmodium yoelii*  
609 Malaria. *PLoS Pathog* **12**, e1005975, doi:10.1371/journal.ppat.1005975 (2016).
- 610 15 Zander, R. A. *et al.* Type I Interferons Induce T Regulatory 1 Responses and Restrict  
611 Humoral Immunity during Experimental Malaria. *PLoS Pathog* **12**, e1005945,  
612 doi:10.1371/journal.ppat.1005945 (2016).
- 613 16 Haque, A. *et al.* Type I IFN signaling in CD8- DCs impairs Th1-dependent malaria  
614 immunity. *J Clin Invest* **124**, 2483-2496 (2014).
- 615 17 Haque, A. *et al.* Type I interferons suppress CD4(+) T-cell-dependent parasite control  
616 during blood-stage *Plasmodium* infection. *Eur J Immunol* **41**, 2688-2698 (2011).
- 617 18 Edwards, C. L. *et al.* Spatiotemporal requirements for IRF7 in mediating type I IFN-  
618 dependent susceptibility to blood-stage *Plasmodium* infection. *Eur J Immunol* **45**,  
619 130-141 (2015).
- 620 19 Montes de Oca, M. *et al.* Type I Interferons Regulate Immune Responses in Humans  
621 with Blood-Stage *Plasmodium falciparum* Infection. *Cell reports* **17**, 399-412 (2016).
- 622 20 Ioannidis, L. J. *et al.* Monocyte- and Neutrophil-Derived CXCL10 Impairs Efficient  
623 Control of Blood-Stage Malaria Infection and Promotes Severe Disease. *J Immunol*  
624 **196**, 1227-1238 (2016).

- 625 21 Cowland, J. B. & Borregaard, N. Granulopoiesis and granules of human neutrophils.  
626 *Immunol Rev* **273**, 11-28, doi:10.1111/imr.12440 (2016).
- 627 22 Weksler, B. B., Jaffe, E. A., Brower, M. S. & Cole, O. F. Human leukocyte cathepsin  
628 G and elastase specifically suppress thrombin-induced prostacyclin production in  
629 human endothelial cells. *Blood* **74**, 1627-1634 (1989).
- 630 23 Binks, R. H. & Conway, D. J. The major allelic dimorphisms in four Plasmodium  
631 falciparum merozoite proteins are not associated with alternative pathways of  
632 erythrocyte invasion. *Mol Biochem Parasitol* **103**, 123-127 (1999).
- 633 24 Satchwell, T. J. Erythrocyte invasion receptors for Plasmodium falciparum: new and  
634 old. *Transfusion medicine* **26**, 77-88 (2016).
- 635 25 Malaria Genomic Epidemiology, N., Band, G., Rockett, K. A., Spencer, C. C. &  
636 Kwiatkowski, D. P. A novel locus of resistance to severe malaria in a region of  
637 ancient balancing selection. *Nature* **526**, 253-257 (2015).
- 638 26 Leffler, E. M. *et al.* Resistance to malaria through structural variation of red blood cell  
639 invasion receptors. *Science*, eaam6393, doi:10.1126/science.aam6393 (2017).
- 640 27 Crosnier, C. *et al.* Basigin is a receptor essential for erythrocyte invasion by  
641 Plasmodium falciparum. *Nature* **480**, 534-537 (2011).
- 642 28 Pasvol, G., Wainscoat, J. S. & Weatherall, D. J. Erythrocytes deficiency in  
643 glycophorin resist invasion by the malarial parasite Plasmodium falciparum. *Nature*  
644 **297**, 64-66 (1982).
- 645 29 Clark, M. A. *et al.* Host iron status and iron supplementation mediate susceptibility to  
646 erythrocytic stage Plasmodium falciparum. *Nature communications* **5**, 4446,  
647 doi:10.1038/ncomms5446 (2014).

- 648 30 Kennedy, A. T. *et al.* Recruitment of Factor H as a Novel Complement Evasion  
649 Strategy for Blood-Stage Plasmodium falciparum Infection. *J Immunol* **196**, 1239-  
650 1248 (2016).
- 651 31 Rosa, T. F. *et al.* The Plasmodium falciparum blood stages acquire factor H family  
652 proteins to evade destruction by human complement. *Cell Microbiol* **18**, 573-590  
653 (2016).
- 654 32 Gwamaka, M. *et al.* Iron deficiency protects against severe Plasmodium falciparum  
655 malaria and death in young children. *Clin Infect Dis* **54**, 1137-1144 (2012).
- 656 33 Pasricha, S. R. *et al.* Expression of the iron hormone hepcidin distinguishes different  
657 types of anemia in African children. *Sci Transl Med* **6**, 235re233,  
658 doi:10.1126/scitranslmed.3008249 (2014).
- 659 34 Parente, R., Clark, S. J., Inforzato, A. & Day, A. J. Complement factor H in host  
660 defense and immune evasion. *Cell Molecular Life Sci* **74**, 1605-1624 (2017).
- 661 35 Oon, S., Wilson, N. J. & Wicks, I. Targeted therapeutics in SLE: emerging strategies  
662 to modulate the interferon pathway. *Clin Transl Immunol* **5**, e79,  
663 doi:10.1038/cti.2016.26 (2016).
- 664 36 Pease, J. E. Designing small molecule CXCR3 antagonists. *Expert Opin Drug Discov*  
665 **12**, 159-168 (2017).
- 666 37 Cunnington, A. J., Bretscher, M. T., Nogaro, S. I., Riley, E. M. & Walther, M.  
667 Comparison of parasite sequestration in uncomplicated and severe childhood  
668 Plasmodium falciparum malaria. *J Infect* **67**, 220-230 (2013).
- 669 38 Dondorp, A. M. *et al.* Estimation of the total parasite biomass in acute falciparum  
670 malaria from plasma PfHRP2. *PLoS medicine* **2**, e204,  
671 doi:10.1371/journal.pmed.0020204 (2005).

- 672 39 Griffin, J. T. *et al.* Gradual acquisition of immunity to severe malaria with increasing  
673 exposure. *Proc Biol Sci* **282**, doi:10.1098/rspb.2014.2657 (2015).
- 674 40 Walther, M. *et al.* HMOX1 gene promoter alleles and high HO-1 levels are associated  
675 with severe malaria in Gambian children. *PLoS Pathog* **8**, e1002579, doi:  
676 10.1371/journal.ppat.1002579 (2012).
- 677 41 Walther, M. *et al.* Distinct roles for FOXP3 and FOXP3 CD4 T cells in regulating  
678 cellular immunity to uncomplicated and severe Plasmodium falciparum malaria. *PLoS*  
679 *Pathog* **5**, e1000364, doi:10.1371/journal.ppat.1000364 (2009).
- 680 42 Marsh, K. *et al.* Indicators of life-threatening malaria in African children. *N Engl J*  
681 *Med* **332**, 1399-1404 (1995).
- 682 43 R Development Core Team. *R: A language and environment for statistical computing.*  
683 *R Foundation for Statistical Computing*, <URL <http://www.R-project.org/>> (2014).
- 684 44 Wood, S. N. Fast stable restricted maximum likelihood and marginal likelihood  
685 estimation of semiparametric generalized linear models. *J R Stat Soc B* **73**, 3-36  
686 (2011).
- 687 45 Dobin, A. *et al.* STAR: ultrafast universal RNA-seq aligner. *Bioinformatics* **29**, 15-21  
688 (2013).
- 689 46 DeLuca, D. S. *et al.* RNA-SeQC: RNA-seq metrics for quality control and process  
690 optimization. *Bioinformatics* **28**, 1530-1532 (2012).
- 691 47 Anders, S., Pyl, P. T. & Huber, W. HTSeq--a Python framework to work with high-  
692 throughput sequencing data. *Bioinformatics* **31**, 166-169 (2015).
- 693 48 Robinson, M. D., McCarthy, D. J. & Smyth, G. K. edgeR: a Bioconductor package for  
694 differential expression analysis of digital gene expression data. *Bioinformatics* **26**,  
695 139-140 (2010).

- 696 49 Chikina, M., Zaslavsky, E. & Sealfon, S. C. CellCODE: a robust latent variable  
697 approach to differential expression analysis for heterogeneous cell populations.  
698 *Bioinformatics* **31**, 1584-1591 (2015).
- 699 50 Abbas, A. R. *et al.* Immune response in silico (IRIS): immune-specific genes  
700 identified from a compendium of microarray expression data. *Genes Immun* **6**, 319-  
701 331 (2005).
- 702 51 Supek, F., Bosnjak, M., Skunca, N. & Smuc, T. REVIGO summarizes and visualizes  
703 long lists of gene ontology terms. *PLoS One* **6**, e21800,  
704 doi:10.1371/journal.pone.0021800 (2011).
- 705 52 Trager, W. & Jensen, J. B. Human malaria parasites in continuous culture. *Science*  
706 **193**, 673-675 (1976).
- 707 53 Maier, A. G. & Rug, M. In vitro culturing Plasmodium falciparum erythrocytic stages.  
708 *Methods Mol Biol* **923**, 3-15 (2013).
- 709 54 Dluzewski, A. R., Ling, I. T., Rangachari, K., Bates, P. A. & Wilson, R. J. A simple  
710 method for isolating viable mature parasites of Plasmodium falciparum from cultures.  
711 *Trans R Soc Trop Med Hyg* **78**, 622-624 (1984).
- 712 55 Ribaut, C. *et al.* Concentration and purification by magnetic separation of the  
713 erythrocytic stages of all human Plasmodium species. *Malar J* **7**, 45,  
714 doi:10.1186/1475-2875-7-45 (2008).
- 715 56 Malleret, B. *et al.* A rapid and robust tri-color flow cytometry assay for monitoring  
716 malaria parasite development. *Sci Rep* **1**, 118, doi:10.1038/srep00118 (2011).
- 717 57 Pouw, R. B. *et al.* Complement Factor H-Related Protein 3 Serum Levels Are Low  
718 Compared to Factor H and Mainly Determined by Gene Copy Number Variation in  
719 CFHR3. *PLoS One* **11**, e0152164, doi:10.1371/journal.pone.0152164 (2016).
- 720

721 **Acknowledgments:** We are grateful to Klaus Dietz for providing the original data and  
722 parameter estimates from malariatherapy patients and his model; to subjects who donated  
723 samples; to staff at MRC Gambia Unit for collection of samples; and to the St. Mary's NHLI  
724 FACS core facility and Yanping Guo for support and instrumentation. **Funding:** This work  
725 was supported by the Medical Research Council (MRC) UK via core funding to the malaria  
726 research programme at the MRC Unit, The Gambia, and MRC Clinical Research Fellowships  
727 (G0701427 and MR/L006529/1) to A.J.C.; by a Wellcome Trust Value In People Award to  
728 A.J.C; and by European Union's seventh Framework program under EC-GA no. 279185  
729 (EUCLIDS; [www.euclids-project.eu](http://www.euclids-project.eu)). **Author contributions:** A.J.C., A.G., A.E.vB., F.F.,  
730 D.J.C., D.N., and M.W. collected the data used in the study; A.J.C., E.M.R., M.T.B., M.W.  
731 and D.J.C designed the study; U.D'A. and D.N. provided access to facilities and samples;  
732 A.J.C. and M.T.B. developed the mathematical model; A.J.C., A.G., M.T.B., H.J.L., F.F., and  
733 A.E.vB. analysed the data; D.W., T.W.K, D.N., U.D'A.,E.M.R., M.L., L.J.C., D.J.C., and  
734 A.J.C supervised aspects of the project; all authors contributed to interpretation of the results  
735 and drafting the manuscript. **Competing interests:** The authors declare that they have no  
736 competing financial interests.
